# Supplementary material
Source: PubMed Central journal article supplement (PMC4309715)
Supplement: AEM.03138-14_zam999116020so1.pdf [file AEM.03138-14_zam999116020so1.pdf]

**Figure S1.** Heatmap illustrating the core rumen microbiome with bacterial taxa prevalence at the pre-partum period for 115 cows enrolled in the study. Bacteria were ordered from the highest (red color) to lowest (green color) average prevalence. The letters in front of the bacterial names identify the lowest level of classification (k=kingdom, p=phylum, c=class, o=order, f=family, and g=genus).

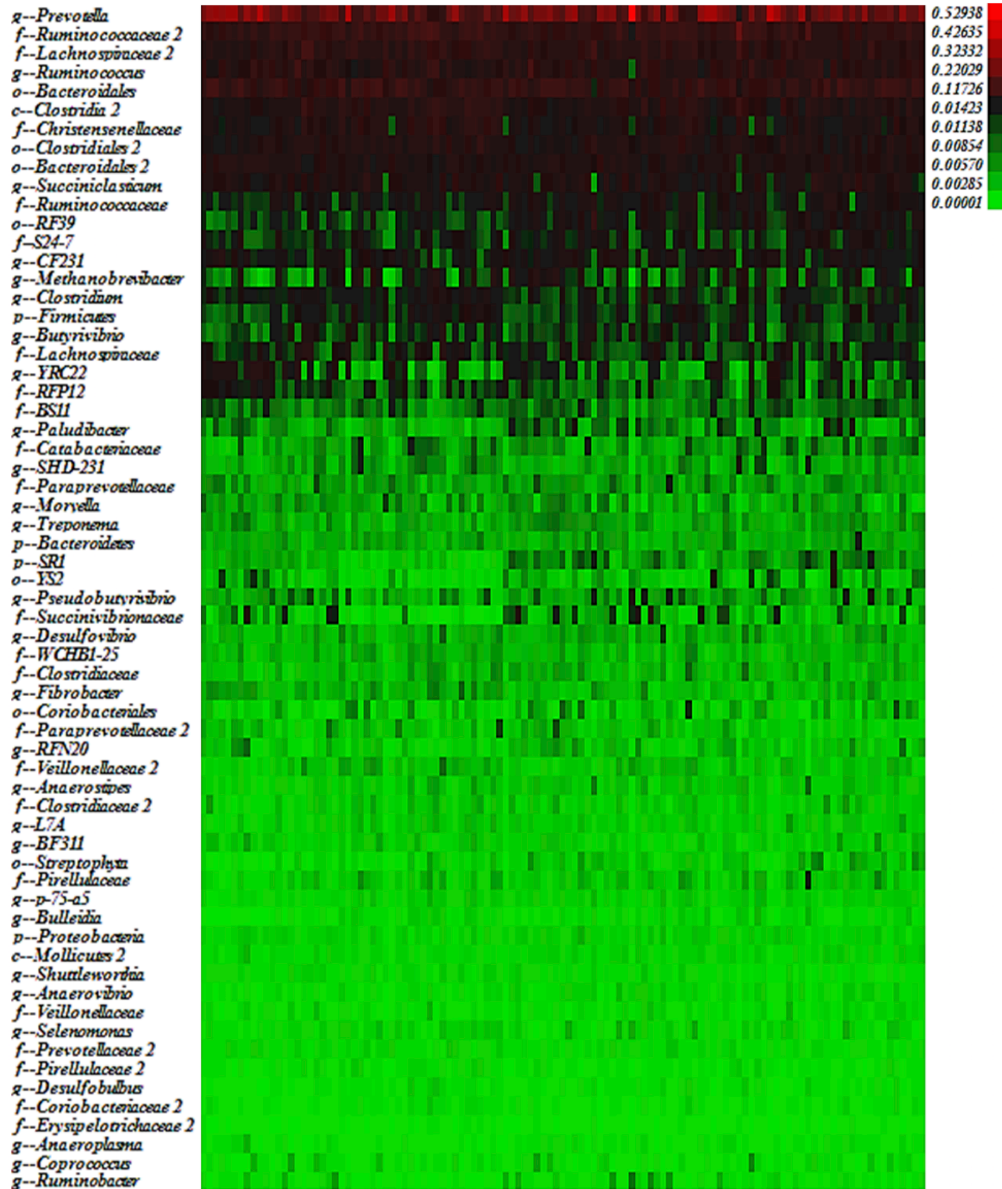

**Figure S2.** Heatmap illustrating the core rumen microbiome with bacterial taxa prevalence at the postpartum period for 115 cows enrolled in the study. Bacteria were ordered from the highest (red color) to lowest (green color) average prevalence. The letters in front of the bacterial names identify the lowest level of classification (k=kingdom, p=phylum, c=class, o=order, f=family, and g=genus).

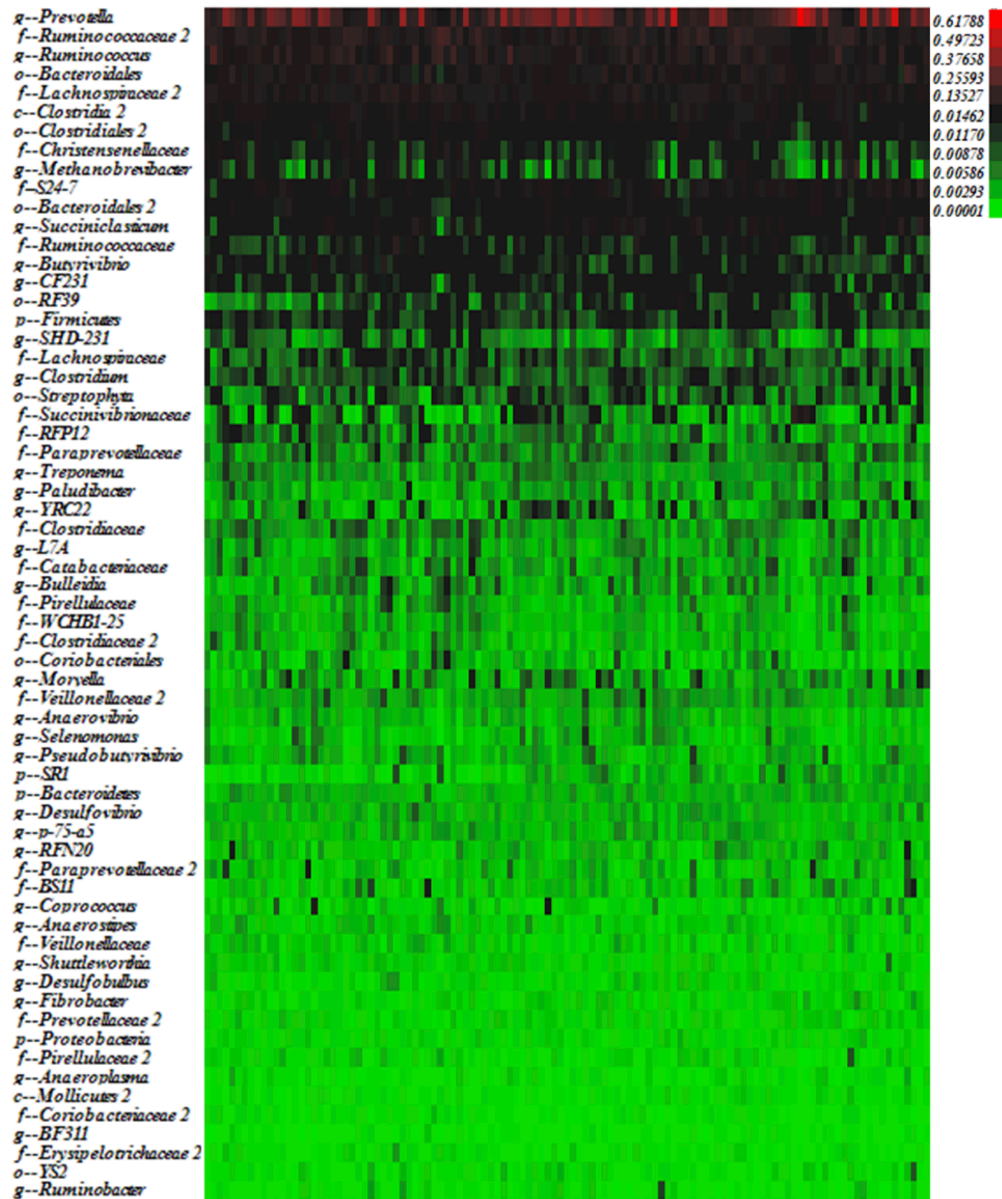

**Figure S3.** Graph bars illustrating the means relative abundance for the twelve most prevalent bacterial species. Mean bacterial species prevalence according to period relative to calving (prepartum and postpartum) and parity (multiparous and primiparous) is represented by the x axis values. Error bars represent the standard errors.

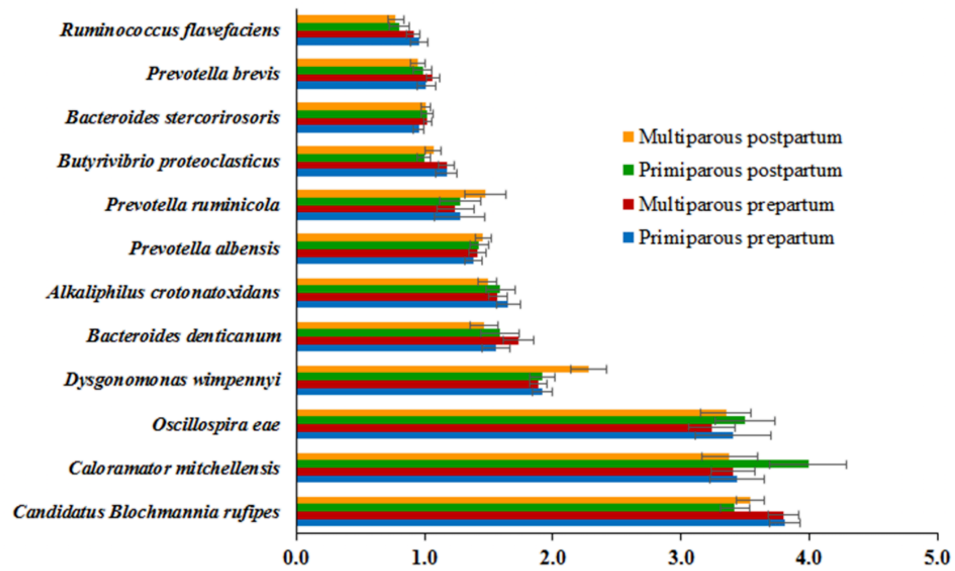

**Figure S4.** Linear regression illustration of microbiome-predicted milk fat percent and actual milk fat percent. The x axis represents the microbiome-predicted milk fat percent according to microbial genera that significantly affected milk fat percent for monthly values and the y axis represents the actual average of monthly milk fat percent. Legend shows different milk fat percent quartiles.

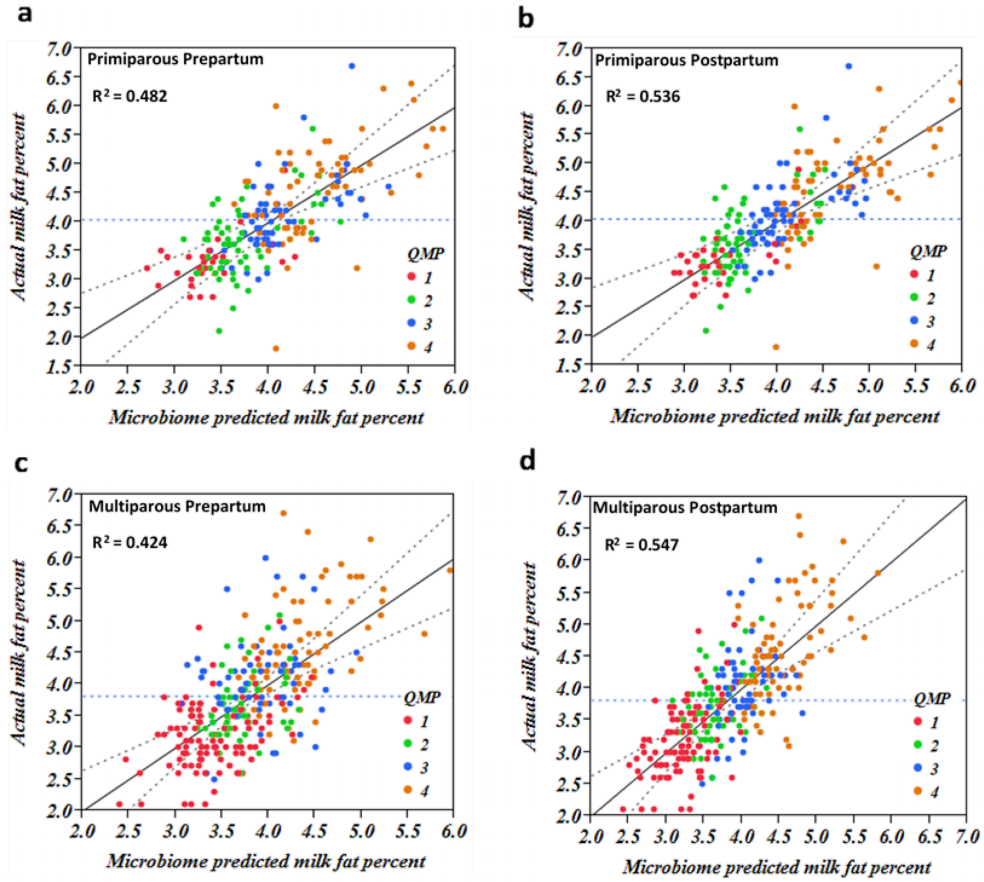

**Figure S5.** Linear regression illustration of microbiome-predicted milk protein percent and actual milk protein percent. The x axis represents the microbiome-predicted milk protein percent according to microbial genera that significantly affected milk protein percent for monthly values and the y axis represents the actual average of monthly milk protein percent. Legend shows different milk protein percent quartiles.

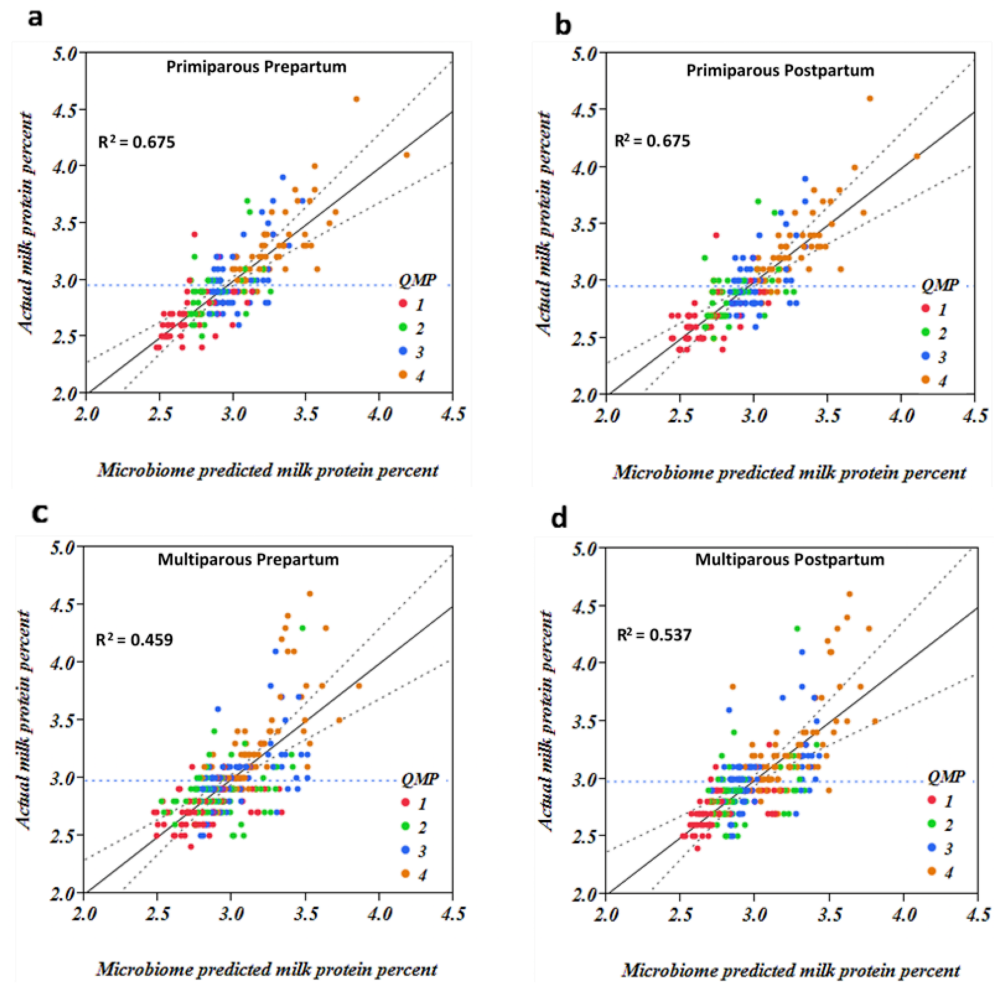

**Figure S6.** Heatmap illustrating correlations between the most prevalent core microbiome components prepartum and postpartum. The color and intensity of each square represent the value of the correlation between bacteria observed at the prepartum and postpartum periods. The color legend represents the values of the correlations. The letters in front of the bacterial names identify the lowest level of classification (k=kingdom, p=phylum, c=class, o=order, f=family, and g=genus).

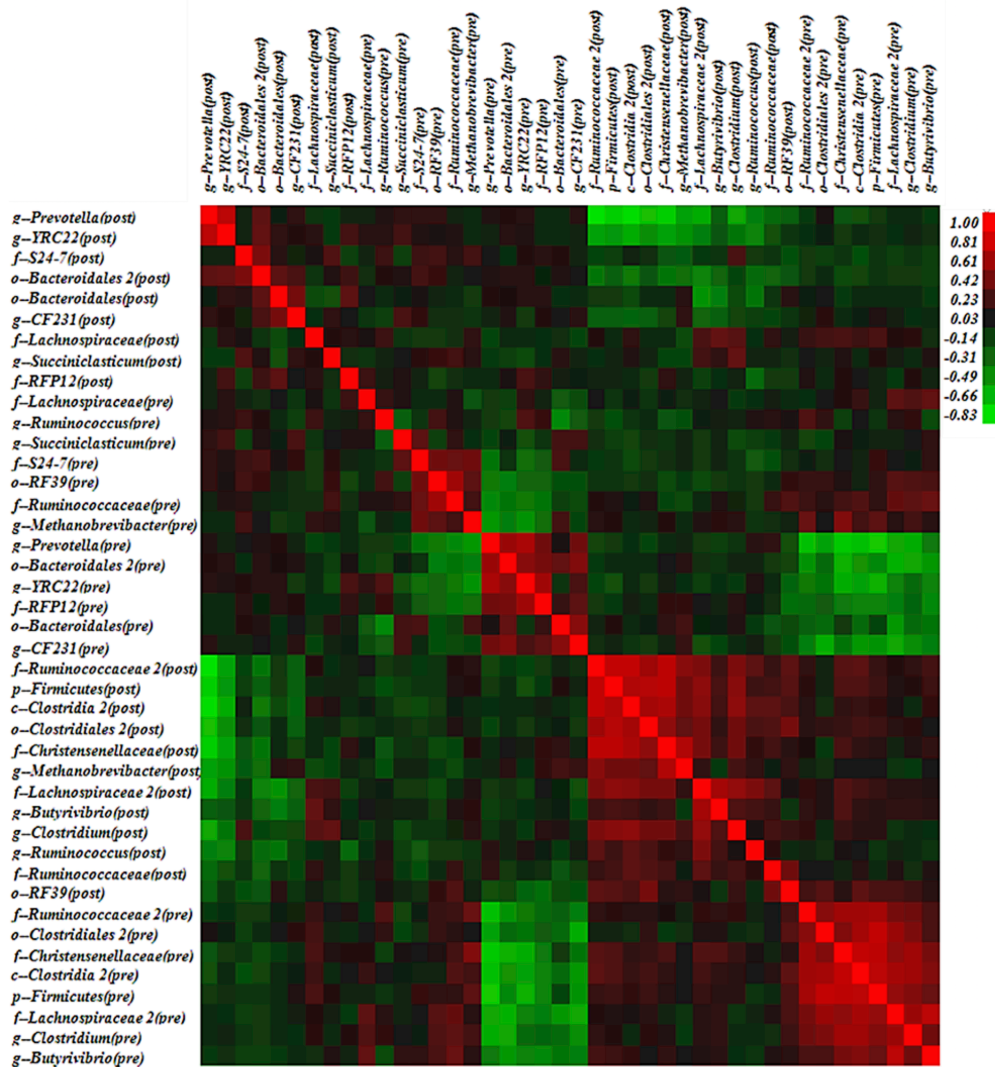

**Table S1.** Ingredient and nutrient composition of prepartum and postpartum diet (DM basis).

| ITEM                                       | DIET      |            |
|--------------------------------------------|-----------|------------|
|                                            | Prepartum | Postpartum |
| <b>INGREDIENTS, %</b>                      |           |            |
| WHEAT STRAW                                | 36.00     | 6.90       |
| ALFALFA SILAGE                             | --        | 14.74      |
| CORN SILAGE                                | 32.76     | 38.48      |
| GRASS SILAGE                               | 7.27      | --         |
| CORN MEAL                                  | --        | 15.85      |
| WHEY                                       | 3.09      | 2.86       |
| BLOOD MEAL                                 | 1.64      | 1.23       |
| SOY PLUS                                   | --        | 7.35       |
| LIMESTONE GROUND                           | 1.89      | 0.94       |
| CANOLA MEAL                                | 7.45      | 3.60       |
| DISTILLERS GRAIN                           | --        | 1.44       |
| CORN GLUTEN                                | 7.56      | 2.95       |
| BERGA FAT F-100 <sup>1</sup>               | --        | 1.59       |
| MINTREX <sup>2</sup>                       | 0.07      | 0.04       |
| MEPRON <sup>3</sup>                        | --        | 0.03       |
| SMARTAMINE <sup>4</sup>                    | 0.04      | 0.02       |
| NACL                                       | 0.22      | 0.40       |
| PREPARTUM MINERAL SUPPLEMENT <sup>5</sup>  | 2.00      | --         |
| POSTPARTUM MINERAL SUPPLEMENT <sup>6</sup> | --        | 0.46       |
| <b>NUTRIENT PROFILE</b>                    |           |            |
| NEL, MCAL/KG <sup>6</sup>                  | 1.39      | 1.69       |
| CP, %                                      | 13.65     | 16.50      |
| SOLUBLE PROTEIN, %                         | 5.20      | 6.14       |
| NDF, %                                     | 38.23     | 24.15      |
| ADF, %                                     | 43.28     | 30.09      |
| NFC, %                                     | 30.51     | 40.83      |
| STARCH, %                                  | 14.04     | 25.32      |
| SUGAR, %                                   | 6.88      | 4.92       |
| ETHER EXTRACT,                             | 3.13      | 5.32       |
| CA, %                                      | 1.43      | 0.90       |
| P, %                                       | 0.42      | 0.39       |
| MG, %                                      | 0.45      | 0.32       |
| K, %                                       | 1.52      | 1.56       |
| NA, %                                      | 0.15      | 0.47       |
| CL, %                                      | 0.44      | 0.77       |
| S, %                                       | 0.49      | 0.26       |
| CU, PPM                                    | 16.81     | 22.52      |
| MN, PPM                                    | 96.21     | 65.03      |
| SE, PPM                                    | 0.45      | 0.70       |
| ZN, PPM                                    | 66.61     | 84.93      |

|                          |          |          |
|--------------------------|----------|----------|
| <b>VITAMIN A, IU/KG</b>  | 6,364.00 | 6,577.49 |
| <b>VITAMIN D3, IU/KG</b> | 1,148.00 | 1,452.09 |
| <b>VITAMIN E, IU/KG</b>  | 56.86    | 32.46    |

---



**Table S2.** Relative abundance of taxa in the core rumen microbiome according to period relative to calving

| TAXA LEVEL | Classification            | PERIOD RELATIVE TO CALVING |               |
|------------|---------------------------|----------------------------|---------------|
|            |                           | Prepartum                  | Postpartum    |
| GENUS      | <i>Anaeroplasma</i>       | 0.05 ± 0.005               | 0.06 ± 0.005  |
| GENUS      | <i>Anaerostipes</i>       | 0.20 ± 0.012               | 0.15 ± 0.010  |
| GENUS      | <i>Anaerovibrio</i>       | 0.08 ± 0.008               | 0.24 ± 0.015  |
| ORDER      | Bacteroidales             | 7.20 ± 0.213               | 5.75 ± 0.240  |
| ORDER      | Bacteroidales 2           | 3.19 ± 0.081               | 2.67 ± 0.107  |
| PHYLUM     | Bacteroidetes             | 0.39 ± 0.017               | 0.27 ± 0.011  |
| GENUS      | <i>BF311</i>              | 0.16 ± 0.009               | 0.03 ± 0.003  |
| FAMILY     | BS11                      | 0.79 ± 0.029               | 0.24 ± 0.029  |
| GENUS      | <i>Bulleidia</i>          | 0.08 ± 0.006               | 0.39 ± 0.029  |
| GENUS      | <i>Butyrivibrio</i>       | 1.41 ± 0.071               | 1.82 ± 0.095  |
| FAMILY     | Catabacteriaceae          | 0.55 ± 0.032               | 0.41 ± 0.030  |
| GENUS      | <i>CF231</i>              | 2.00 ± 0.064               | 1.76 ± 0.065  |
| FAMILY     | Christensenellaceae       | 3.32 ± 0.156               | 2.24 ± 0.137  |
| CLASS      | <i>Clostridia</i> 2       | 4.12 ± 0.167               | 3.82 ± 0.018  |
| FAMILY     | Clostridiaceae            | 0.30 ± 0.010               | 0.48 ± 0.025  |
| FAMILY     | Clostridiaceae 2          | 0.17 ± 0.010               | 0.26 ± 0.018  |
| ORDER      | <i>Clostridiales</i> 2    | 3.49 ± 0.118               | 2.90 ± 0.111  |
| GENUS      | <i>Clostridium</i>        | 1.64 ± 0.062               | 1.00 ± 0.041  |
| GENUS      | <i>Coprococcus</i>        | 0.08 ± 0.009               | 0.19 ± 0.047  |
| FAMILY     | Coriobacteriaceae 2       | 0.05 ± 0.003               | 0.05 ± 0.003  |
| ORDER      | Coriobacteriales          | 0.24 ± 0.023               | 0.26 ± 0.023  |
| GENUS      | <i>Desulfobulbus</i>      | 0.06 ± 0.004               | 0.10 ± 0.007  |
| GENUS      | <i>Desulfovibrio</i>      | 0.35 ± 0.004               | 0.36 ± 0.012  |
| FAMILY     | Erysipelotrichaceae 2     | 0.02 ± 0.002               | 0.05 ± 0.005  |
| GENUS      | <i>Fibrobacter</i>        | 0.33 ± 0.016               | 0.10 ± 0.007  |
| PHYLUM     | Firmicutes                | 1.51 ± 0.057               | 1.41 ± 0.060  |
| GENUS      | <i>L7A</i>                | 0.17 ± 0.008               | 0.36 ± 0.023  |
| FAMILY     | Lachnospiraceae           | 1.57 ± 0.080               | 1.06 ± 0.064  |
| FAMILY     | Lachnospiraceae 2         | 5.44 ± 0.162               | 5.74 ± 0.164  |
| GENUS      | <i>Methanobrevibacter</i> | 1.61 ± 0.115               | 2.11 ± 0.203  |
| CLASS      | <i>Mollicutes</i> 2       | 0.11 ± 0.004               | 0.06 ± 0.004  |
| GENUS      | <i>Moryella</i>           | 0.43 ± 0.023               | 0.45 ± 0.037  |
| GENUS      | <i>p-75-a5</i>            | 0.13 ± 0.006               | 0.25 ± 0.011  |
| GENUS      | <i>Paludibacter</i>       | 0.61 ± 0.042               | 0.41 ± 0.032  |
| FAMILY     | Paraprevotellaceae        | 0.48 ± 0.020               | 0.60 ± 0.020  |
| FAMILY     | Paraprevotellaceae 2      | 0.23 ± 0.017               | 0.23 ± 0.025  |
| FAMILY     | Pirellulaceae             | 0.21 ± 0.017               | 0.30 ± 0.023  |
| FAMILY     | Pirellulaceae 2           | 0.06 ± 0.004               | 0.09 ± 0.004  |
| GENUS      | <i>Prevotella</i>         | 19.51 ± 0.822              | 21.26 ± 1.205 |
| FAMILY     | <i>Prevotellaceae</i> 2   | 0.08 ± 0.004               | 0.10 ± 0.005  |
| PHYLUM     | Proteobacteria            | 0.13 ± 0.005               | 0.09 ± 0.005  |
| GENUS      | <i>Pseudobutyrvibrio</i>  | 0.53 ± 0.040               | 0.28 ± 0.020  |
| ORDER      | <i>RF39</i>               | 1.77 ± 0.091               | 1.35 ± 0.093  |
| GENUS      | <i>RFN20</i>              | 0.22 ± 0.016               | 0.23 ± 0.021  |
| FAMILY     | <i>RFP12</i>              | 1.12 ± 0.052               | 0.63 ± 0.040  |
| GENUS      | <i>Ruminobacter</i>       | 0.09 ± 0.013               | 0.06 ± 0.011  |
| FAMILY     | Ruminococcaceae           | 2.03 ± 0.078               | 1.92 ± 0.127  |
| FAMILY     | Ruminococcaceae 2         | 7.26 ± 0.213               | 8.00 ± 0.336  |
| GENUS      | <i>Ruminococcus</i>       | 4.85 ± 0.183               | 7.33 ± 0.377  |
| FAMILY     | <i>S24-7</i>              | 1.62 ± 0.065               | 3.80 ± 0.177  |
| GENUS      | <i>Selenomonas</i>        | 0.11 ± 0.008               | 0.23 ± 0.020  |

|               |                            |              |              |
|---------------|----------------------------|--------------|--------------|
| <b>GENUS</b>  | <i>SHD-231</i>             | 0.46 ± 0.029 | 0.73 ± 0.056 |
| <b>GENUS</b>  | <i>Shuttleworthia</i>      | 0.09 ± 0.004 | 0.12 ± 0.008 |
| <b>PHYLUM</b> | <i>SR1</i>                 | 0.46 ± 0.033 | 0.21 ± 0.020 |
| <b>ORDER</b>  | <i>Streptophyta</i>        | 0.16 ± 0.014 | 1.02 ± 0.070 |
| <b>GENUS</b>  | <i>Succiniclasticum</i>    | 3.06 ± 0.121 | 3.37 ± 0.168 |
| <b>FAMILY</b> | <i>Succinivibrionaceae</i> | 0.50 ± 0.070 | 1.04 ± 0.148 |
| <b>GENUS</b>  | <i>Treponema</i>           | 0.42 ± 0.016 | 0.44 ± 0.021 |
| <b>FAMILY</b> | <i>Veillonellaceae</i>     | 0.08 ± 0.006 | 0.13 ± 0.009 |
| <b>FAMILY</b> | <i>Veillonellaceae 2</i>   | 0.23 ± 0.013 | 0.37 ± 0.020 |
| <b>FAMILY</b> | <i>WCHB1-25</i>            | 0.31 ± 0.013 | 0.27 ± 0.016 |
| <b>GENUS</b>  | <i>YRC22</i>               | 1.40 ± 0.108 | 0.55 ± 0.052 |
| <b>ORDER</b>  | <i>YS2</i>                 | 0.32 ± 0.037 | 0.07 ± 0.009 |

**Table S3.** Estimates (coefficients), P-values, and P-values adjusted for false discovery rate (FDR) for variables included in multivariable regression models used to predict milk production.

| Multivariable Regression Model | Variables              | Estimates    | P-value     | P-value adjusted for FDR |
|--------------------------------|------------------------|--------------|-------------|--------------------------|
| Primiparous prepartum          | c--Deltaproteobacteria | -5192.106941 | 2.20752E-05 | 0.000281835              |
| Primiparous prepartum          | c--Gammaproteobacteria | -11600.91503 | 1.52365E-24 | 1.94525E-23              |
| Primiparous prepartum          | f--Bacteroidaceae 2    | -60803.96647 | 3.257E-23   | 4.15822E-22              |
| Primiparous prepartum          | f--Bifidobacteriaceae  | -211332.9459 | 1.13409E-06 | 1.4479E-05               |
| Primiparous prepartum          | f--Caulobacteraceae 2  | 123251.821   | 2.57684E-15 | 3.28986E-14              |
| Primiparous prepartum          | f--Fusobacteriaceae    | 123704.5655  | 8.43472E-16 | 1.07686E-14              |
| Primiparous prepartum          | f--Lachnospiraceae 2   | 76.32144246  | 1.72217E-10 | 2.1987E-09               |
| Primiparous prepartum          | f--Micrococcaceae      | 63552.74406  | 2.19908E-11 | 2.80757E-10              |
| Primiparous prepartum          | g--BF311               | -1280.945826 | 4.86886E-07 | 6.21609E-06              |
| Primiparous prepartum          | g--Holdemania          | -661241.7664 | 4.22005E-35 | 5.38776E-34              |
| Primiparous prepartum          | g--Mitsuokella         | 67694.45099  | 7.74959E-11 | 9.89393E-10              |
| Primiparous prepartum          | g--Paenibacillus       | 106159.3405  | 6.60392E-05 | 0.000843125              |
| Primiparous prepartum          | g--RFN20               | 1459.614836  | 6.76507E-16 | 8.63699E-15              |
| Primiparous prepartum          | g--SJA-88              | 851637.7489  | 5.65788E-53 | 7.22343E-52              |
| Primiparous prepartum          | g--Turcibacter         | 869361.4161  | 4.9645E-35  | 6.3382E-34               |
| Primiparous prepartum          | g--Ureibacillus        | -2018085.388 | 3.35534E-65 | 4.28377E-64              |
| Primiparous prepartum          | Intercept              | 33.58916285  | 5.6732E-135 | 7.243E-134               |
| Primiparous prepartum          | Milk average week 1    | -11.80309312 | 6.95912E-79 | 8.88473E-78              |
| Primiparous prepartum          | Milk average week 10   | 3.390326075  | 7.31526E-10 | 9.33941E-09              |
| Primiparous prepartum          | Milk average week 11   | 4.183981406  | 8.83089E-14 | 1.12744E-12              |
| Primiparous prepartum          | Milk average week 12   | 4.731502067  | 5.57396E-17 | 7.11629E-16              |
| Primiparous prepartum          | Milk average week 2    | -7.011426455 | 3.21839E-35 | 4.10892E-34              |
| Primiparous prepartum          | Milk average week 3    | -3.514729051 | 8.01086E-11 | 1.02275E-09              |
| Primiparous prepartum          | Milk average week 4    | -1.10660526  | 0.03713941  | 0.47416007               |
| Primiparous prepartum          | Milk average week 5    | 0.55683768   | 0.293536737 | 1                        |

|                        |                        |              |             |             |
|------------------------|------------------------|--------------|-------------|-------------|
| Primiparous prepartum  | Milk average week 6    | 1.978501123  | 0.000207538 | 0.002649644 |
| Primiparous prepartum  | Milk average week 7    | 2.713386694  | 5.41269E-07 | 6.91039E-06 |
| Primiparous prepartum  | Milk average week 8    | 3.187694994  | 4.60317E-09 | 5.87688E-08 |
| Primiparous prepartum  | o--Anaeroplasmatales 2 | 7785.143652  | 0.003916337 | 0.05        |
| Primiparous prepartum  | o--Pirellulales        | -18497.20395 | 9.50051E-14 | 1.21293E-12 |
| Primiparous postpartum | c--Deltaproteobacteria | -42247.47153 | 5.12259E-41 | 1.99406E-40 |
| Primiparous postpartum | f--Bacillaceae         | 30132.0896   | 4.01806E-11 | 1.5641E-10  |
| Primiparous postpartum | f--Desulfobulbaceae    | -20576.79686 | 1.00364E-41 | 3.90683E-41 |
| Primiparous postpartum | f--Enterobacteriaceae  | 32035.94414  | 8.28933E-13 | 3.22677E-12 |
| Primiparous postpartum | f--Erysipelotrichaceae | 76585.88177  | 2.15881E-46 | 8.40357E-46 |
| Primiparous postpartum | f--Pirellulaceae       | -180.5804543 | 0.019594665 | 0.076275718 |
| Primiparous postpartum | f--Spirochaetaceae     | 12730.21197  | 6.16879E-27 | 2.40131E-26 |
| Primiparous postpartum | g--Butyrivibrio        | 270.1871426  | 8.65138E-52 | 3.3677E-51  |
| Primiparous postpartum | g--Campylobacter       | 12528.58125  | 1.60977E-14 | 6.26631E-14 |
| Primiparous postpartum | g--CF231               | -34.73072856 | 0.190482489 | 0.741486961 |
| Primiparous postpartum | g--Oligella            | -17169.88613 | 0.516348831 | 1           |
| Primiparous postpartum | g--Paludibacter        | -144.3832582 | 0.012844628 | 0.05        |
| Primiparous postpartum | g--Xanthomonas         | 1540938.233  | 3.58466E-45 | 1.39539E-44 |
| Primiparous postpartum | Intercept              | 22.51697922  | 4.15578E-84 | 1.61771E-83 |
| Primiparous postpartum | k--Archaea             | 444777.5905  | 1.45108E-25 | 5.6486E-25  |
| Primiparous postpartum | Milk average week 1    | -11.87175356 | 1.20256E-79 | 4.68116E-79 |
| Primiparous postpartum | Milk average week 10   | 3.393223116  | 6.80634E-10 | 2.64949E-09 |
| Primiparous postpartum | Milk average week 11   | 4.125677348  | 1.74522E-13 | 6.79357E-13 |
| Primiparous postpartum | Milk average week 12   | 4.673198009  | 1.16308E-16 | 4.52749E-16 |
| Primiparous postpartum | Milk average week 2    | -7.080086893 | 8.2521E-36  | 3.21228E-35 |
| Primiparous postpartum | Milk average week 3    | -3.494776149 | 9.77318E-11 | 3.80438E-10 |
| Primiparous postpartum | Milk average week 4    | -1.086652358 | 0.040521935 | 0.157738839 |
| Primiparous postpartum | Milk average week 5    | 0.576790582  | 0.276229027 | 1           |
| Primiparous postpartum | Milk average week 6    | 1.998454025  | 0.000177146 | 0.000689571 |
| Primiparous postpartum | Milk average week 7    | 2.770460142  | 3.08788E-07 | 1.20201E-06 |
| Primiparous postpartum | Milk average week 8    | 3.244768443  | 2.4125E-09  | 9.39107E-09 |

|                               |                            |              |             |             |
|-------------------------------|----------------------------|--------------|-------------|-------------|
| <b>Primiparous postpartum</b> | o--Actinomycetales         | -66496.4827  | 1.66901E-07 | 6.4969E-07  |
| <b>Multiparous prepartum</b>  | f--Peptostreptococcaceae   | -227496.2383 | 1.86993E-06 | 5.52239E-07 |
| <b>Multiparous prepartum</b>  | f--Porphyromonadaceae 2    | -33461.79635 | 9.84913E-31 | 2.9087E-31  |
| <b>Multiparous prepartum</b>  | g--Acinetobacter           | -7786.925464 | 5.6097E-08  | 1.65669E-08 |
| <b>Multiparous prepartum</b>  | g--Corynebacterium         | -33917.03191 | 3.94946E-08 | 1.16638E-08 |
| <b>Multiparous prepartum</b>  | g--Faecalibacterium        | -912.1235844 | 9.83682E-16 | 2.90507E-16 |
| <b>Multiparous prepartum</b>  | g--Lautropia               | -347230.9552 | 9.2468E-20  | 2.73082E-20 |
| <b>Multiparous prepartum</b>  | g--Solibacillus            | -159805.0107 | 3.28379E-07 | 9.69788E-08 |
| <b>Multiparous prepartum</b>  | g--Virgibacillus           | 157292.6499  | 1.48908E-29 | 4.39762E-30 |
| <b>Multiparous prepartum</b>  | Intercept                  | 53.59249432  | 0           | 0           |
| <b>Multiparous prepartum</b>  | Milk average week 1        | -12.94438403 | 3.27331E-61 | 9.66694E-62 |
| <b>Multiparous prepartum</b>  | Milk average week 10       | 2.713038811  | 0.000215837 | 6.37423E-05 |
| <b>Multiparous prepartum</b>  | Milk average week 11       | 3.259913811  | 9.13396E-06 | 2.69749E-06 |
| <b>Multiparous prepartum</b>  | Milk average week 12       | 2.632530116  | 0.000363678 | 0.000107403 |
| <b>Multiparous prepartum</b>  | Milk average week 2        | -6.974234779 | 2.91969E-21 | 8.62259E-22 |
| <b>Multiparous prepartum</b>  | Milk average week 3        | -2.401643191 | 0.00082172  | 0.000242675 |
| <b>Multiparous prepartum</b>  | Milk average week 4        | 0.983702806  | 0.1693046   | 0.05        |
| <b>Multiparous prepartum</b>  | Milk average week 5        | 2.50436774   | 0.000528232 | 0.000156001 |
| <b>Multiparous prepartum</b>  | Milk average week 6        | 2.559464159  | 0.00039763  | 0.00011743  |
| <b>Multiparous prepartum</b>  | Milk average week 7        | 2.432205063  | 0.000825583 | 0.000243816 |
| <b>Multiparous prepartum</b>  | Milk average week 8        | 2.94968758   | 5.15192E-05 | 1.52149E-05 |
| <b>Multiparous prepartum</b>  | o--Anaeroplasmatales 2     | 36406.54201  | 2.37292E-33 | 7.00785E-34 |
| <b>Multiparous prepartum</b>  | o--HA64                    | -10250.18176 | 6.29816E-08 | 1.86001E-08 |
| <b>Multiparous prepartum</b>  | o--PL-11B10                | -6380.806457 | 3.55687E-07 | 1.05043E-07 |
| <b>Multiparous postpartum</b> | c--Actinobacteria          | -65016.09403 | 1.87279E-11 | 1.12859E-11 |
| <b>Multiparous postpartum</b> | c--Betaproteobacteria      | -12476.49968 | 3.89198E-16 | 2.3454E-16  |
| <b>Multiparous postpartum</b> | c--Thermoplasmata          | 392201.7903  | 1.42175E-10 | 8.56781E-11 |
| <b>Multiparous postpartum</b> | f--Alcaligenaceae          | 707496.8738  | 2.43413E-12 | 1.46686E-12 |
| <b>Multiparous postpartum</b> | f--Erysipelotrichaceae     | 52889.55299  | 3.57418E-20 | 2.15388E-20 |
| <b>Multiparous postpartum</b> | f--Peptostreptococcaceae 2 | 119805.258   | 2.89779E-14 | 1.74628E-14 |
| <b>Multiparous postpartum</b> | f--Phyllobacteriaceae      | -489007.4    | 1.13322E-10 | 6.82902E-11 |

|                               |                      |              |             |             |
|-------------------------------|----------------------|--------------|-------------|-------------|
| <b>Multiparous postpartum</b> | f--Pirellulaceae 2   | -2587.126662 | 5.58073E-30 | 3.36308E-30 |
| <b>Multiparous postpartum</b> | f--Prevotellaceae 2  | 5852.18734   | 3.18865E-38 | 1.92156E-38 |
| <b>Multiparous postpartum</b> | f--R4-41B            | -165895.1894 | 7.62532E-31 | 4.5952E-31  |
| <b>Multiparous postpartum</b> | f--Rhodobacteraceae  | 125875.2658  | 4.57818E-17 | 2.75892E-17 |
| <b>Multiparous postpartum</b> | g--BF311             | -3844.757279 | 9.28114E-05 | 5.59303E-05 |
| <b>Multiparous postpartum</b> | g--Bulleidia         | -562.8182958 | 1.11549E-11 | 6.72223E-12 |
| <b>Multiparous postpartum</b> | g--Escherichia       | 51780.62929  | 3.99579E-14 | 2.40796E-14 |
| <b>Multiparous postpartum</b> | g--Faecalibacterium  | 30258.76826  | 0.000431879 | 0.000260261 |
| <b>Multiparous postpartum</b> | g--Kocuria           | -442753.8944 | 2.8504E-50  | 1.71772E-50 |
| <b>Multiparous postpartum</b> | g--Methanosphaera    | 14942.96665  | 3.49161E-11 | 2.10413E-11 |
| <b>Multiparous postpartum</b> | g--Sejonia           | -338908.0479 | 3.96648E-29 | 2.39029E-29 |
| <b>Multiparous postpartum</b> | Intercept            | 46.41113925  | 9.977E-274  | 6.0124E-274 |
| <b>Multiparous postpartum</b> | Milk average week 1  | -12.9575192  | 3.60609E-90 | 2.17312E-90 |
| <b>Multiparous postpartum</b> | Milk average week 10 | 2.70795884   | 2.5031E-06  | 1.50843E-06 |
| <b>Multiparous postpartum</b> | Milk average week 11 | 3.25483384   | 1.6959E-08  | 1.02199E-08 |
| <b>Multiparous postpartum</b> | Milk average week 12 | 2.640077846  | 5.15513E-06 | 3.1066E-06  |
| <b>Multiparous postpartum</b> | Milk average week 2  | -6.987369948 | 1.03275E-32 | 6.22359E-33 |
| <b>Multiparous postpartum</b> | Milk average week 3  | -2.41477836  | 1.77511E-05 | 1.06972E-05 |
| <b>Multiparous postpartum</b> | Milk average week 4  | 0.970567637  | 0.082970514 | 0.05        |
| <b>Multiparous postpartum</b> | Milk average week 5  | 2.529311308  | 7.96749E-06 | 4.8014E-06  |
| <b>Multiparous postpartum</b> | Milk average week 6  | 2.584407727  | 5.06626E-06 | 3.05305E-06 |
| <b>Multiparous postpartum</b> | Milk average week 7  | 2.433960314  | 1.96548E-05 | 1.18444E-05 |
| <b>Multiparous postpartum</b> | Milk average week 8  | 2.951442831  | 2.44504E-07 | 1.47344E-07 |
| <b>Multiparous postpartum</b> | o--GMD14H09          | -26509.31665 | 4.71474E-05 | 2.84122E-05 |
